# Supplementary material for: An individual based computational model of intestinal crypt fission and its application to predicting unrestrictive growth of the intestinal epithelium
Source: Royal Society of Chemistry journal article supplement (doi:10.1039/c4ib00236a), 2014-12-17
Supplement: c4ib00236a7.pdf [file c4ib00236a7.pdf]

**Table S1.** Individual based model parameters

| Parameter     | Value                      | source                 | definition                                                                                                                                                                        |
|---------------|----------------------------|------------------------|-----------------------------------------------------------------------------------------------------------------------------------------------------------------------------------|
| $n_{cells}$   | 235                        | data <sup>29</sup>     | Number of cells in the crypt                                                                                                                                                      |
| $n_{spiral}$  | 33                         | data <sup>29</sup>     | Number of Paneth and Stem cells in the stem cell niche                                                                                                                            |
| $Diff_{Secr}$ | >50%                       | data <sup>29</sup>     | Percentage of secretory neighbouring cells that inhibit differentiation into secretory lineage                                                                                    |
| $D_c$         | $-5.7091 N_d + 21.449$     | data <sup>29, 62</sup> | Duration of division cycle (hours). $N_d$ is the number of undertaken divisions by the cell: its value is fixed to 0 for stem cells and for transit cells the maximum value is 2. |
| $n$           | 6                          | data <sup>29</sup>     | Maximum number of division cycles in transit amplifying cells                                                                                                                     |
| $R_{av}$      | 5                          | data                   | Average cell radius at birth ( $\mu\text{m}$ )                                                                                                                                    |
| $r_{av}$      | $\frac{\pi R_{av}^2}{D_c}$ | data                   | Average growth rate of the surface area of cells ( $\mu\text{m}^2 \text{h}^{-1}$ )                                                                                                |
| $\alpha$      | 1.3                        | data                   | Parameter governing the shear stress threshold in Paneth cells                                                                                                                    |
