# Supplementary figures and images for: An individual based computational model of intestinal crypt fission and its application to predicting unrestrictive growth of the intestinal epithelium
Source: Royal Society of Chemistry journal article supplement (doi:10.1039/c4ib00236a), 2014-12-17

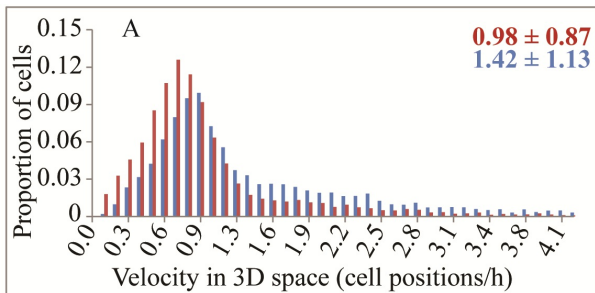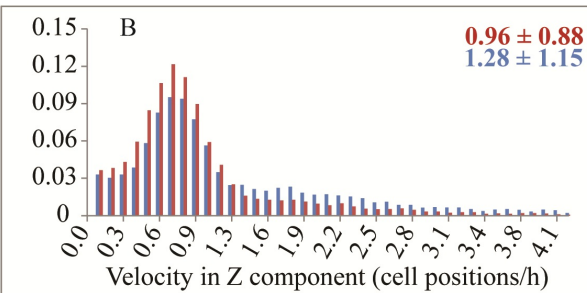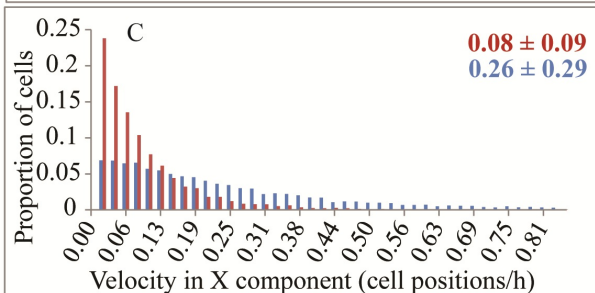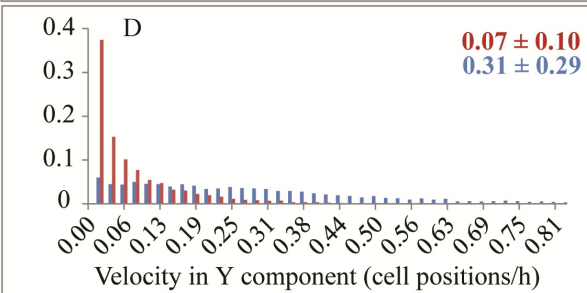

Supplement: c4ib00236a4.pdf [file c4ib00236a4.pdf]

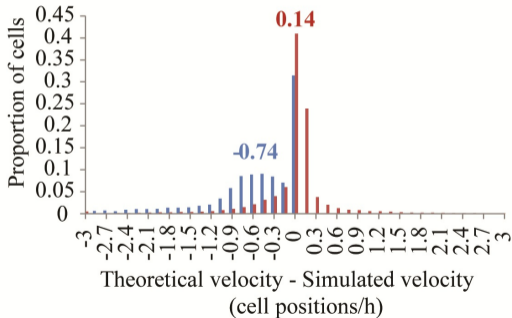

Supplement: c4ib00236a5.pdf [file c4ib00236a5.pdf]

0 days

3.11 days

3.42 days

3.55 days

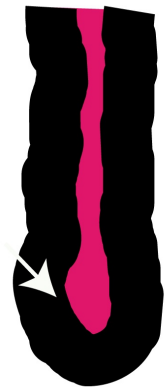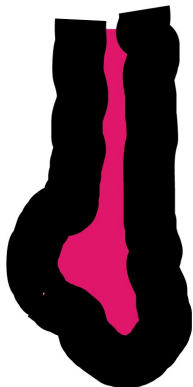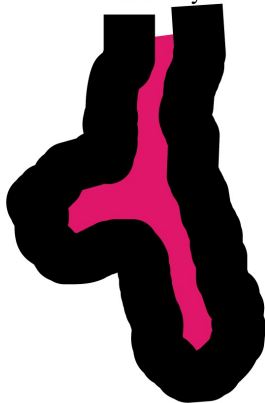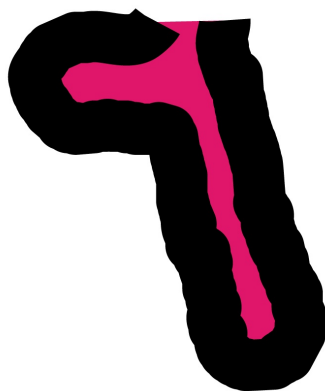

Supplement: c4ib00236a6.pdf [file c4ib00236a6.pdf]
